# Supplementary material for: Solvothermal synthesis of enneanuclear [CuII7LnIII2] clusters
Source: Royal Society of Chemistry journal article supplement (doi:10.1039/c5dt03542b), 2015-01-01
Supplement: c5dt03542b1.pdf [file c5dt03542b1.pdf]

Supporting Information

Solvothermal synthesis of enneanuclear  $[\text{Cu}^{\text{II}}_7\text{Ln}^{\text{III}}_2]$   
clusters

*Angelos B. Canaj,<sup>†</sup> Demetrios I. Tzimopoulos,<sup>‡</sup> Marta Otręba,<sup>‡</sup> Tadeusz Lis,<sup>‡</sup> Ross Inglis<sup>||,\*</sup> and  
Constantinos J. Milios<sup>†,\*</sup>*

<sup>†</sup>Department of Chemistry, The University of Crete, Voutes, 71003, Herakleion, Greece;

<sup>‡</sup>Department of Chemistry, Aristotle University of Thessaloniki, 54124 Thessaloniki, Greece;

<sup>‡</sup>Faculty of Chemistry, University of Wrocław, Joliot-Curie 14, 50-383, Wrocław, Poland;

<sup>||</sup>School of Chemistry, The University of Edinburgh, David Brewster Road, EH9 3FJ Edinburgh,  
UK.

**Table S1.** Crystallographic data for complex **1**.

|                                                | <b>1·2MeCN</b>                                                                                   |
|------------------------------------------------|--------------------------------------------------------------------------------------------------|
| Formula                                        | C <sub>102</sub> H <sub>104</sub> Cu <sub>7</sub> Gd <sub>2</sub> N <sub>8</sub> O <sub>26</sub> |
| <i>M</i> <sub>w</sub>                          | 2617.21                                                                                          |
| Crystal System                                 | Triclinic                                                                                        |
| Space group                                    | P-1                                                                                              |
| <i>a</i> /Å                                    | 11.991 (3)                                                                                       |
| <i>b</i> / Å                                   | 14.520 (4)                                                                                       |
| <i>c</i> /Å                                    | 16.537 (4)                                                                                       |
| <i>α</i> /°                                    | 68.40 (2)                                                                                        |
| <i>β</i> /°                                    | 69.42 (2)                                                                                        |
| <i>γ</i> /°                                    | 84.05 (2)                                                                                        |
| <i>V</i> /Å <sup>3</sup>                       | 2505.1 (12)                                                                                      |
| <i>Z</i>                                       | 1                                                                                                |
| <i>T</i> /K                                    | 170                                                                                              |
| <i>λ</i> /Å                                    | 0.71073                                                                                          |
| <i>D</i> <sub>c</sub> /g cm <sup>-3</sup>      | 1.735                                                                                            |
| <i>μ</i> (Mo-Kα)/ mm <sup>-1</sup>             | 2.84                                                                                             |
| Meas./indep. ( <i>R</i> <sub>int</sub> ) refl. | 25865 / 12167 (0.054)                                                                            |
| Obs. refl. [ <i>I</i> > 2σ( <i>I</i> )]        | 8542                                                                                             |
| <i>wR</i> <sup>2</sup>                         | 0.105                                                                                            |
| <i>R</i> <sup>1</sup>                          | 0.045                                                                                            |
| Goodness of fit on <i>F</i> <sup>2</sup>       | 1.00                                                                                             |
| Δρ <sub>max,min</sub> / eÅ <sup>-3</sup>       | 1.03, -1.03                                                                                      |

**Table S2.** Selected bond distances (°) and angles (Å) for complex **1**.

|                                        |             |                                          |             |
|----------------------------------------|-------------|------------------------------------------|-------------|
| Gd—O14C                                | 2.286 (3)   | Cu1—O14A <sup>i</sup>                    | 1.956 (3)   |
| Gd—O15B                                | 2.317 (3)   | Cu1—O14A                                 | 1.956 (3)   |
| Gd—O14A <sup>i</sup>                   | 2.322 (3)   | Cu1—O15A <sup>i</sup>                    | 1.987 (3)   |
| Gd—O15A                                | 2.422 (3)   | Cu1—O15A                                 | 1.987 (3)   |
| Gd—O3                                  | 2.432 (4)   | Cu1—O1                                   | 2.399 (3)   |
| Gd—O2 <sup>i</sup>                     | 2.436 (3)   | Cu1—O1 <sup>i</sup>                      | 2.399 (3)   |
| Gd—O4                                  | 2.454 (4)   | Cu2—O2A                                  | 1.887 (3)   |
| Gd—O14B                                | 2.541 (3)   | Cu2—N1A                                  | 1.913 (4)   |
| Cu3—O14B                               | 1.976 (3)   | Cu2—O14B                                 | 1.956 (3)   |
| Cu3—O1                                 | 1.994 (3)   | Cu2—O15A                                 | 1.984 (3)   |
| Cu4—O2C                                | 1.885 (3)   | Cu3—O2B                                  | 1.895 (3)   |
| Cu4—O14C                               | 1.920 (3)   | Cu3—N1N                                  | 1.924 (4)   |
| Cu4—N1C                                | 1.927 (4)   | Cu4—O15B                                 | 1.946 (3)   |
|                                        |             |                                          |             |
| O15A—Gd—O2 <sup>i</sup>                | 75.45 (10)  | O14C—Gd—O14B                             | 137.27 (11) |
| O3—Gd—O2 <sup>i</sup>                  | 112.10 (13) | O15B—Gd—O14B                             | 74.89 (10)  |
| O14C—Gd—O4                             | 83.48 (13)  | O14A <sup>i</sup> —Gd—O14B               | 73.06 (10)  |
| O15B—Gd—O4                             | 101.32 (15) | O15A—Gd—O14B                             | 65.06 (10)  |
| O14A <sup>i</sup> —Gd—O4               | 159.24 (14) | O3—Gd—O14B                               | 71.71 (12)  |
| O15A—Gd—O4                             | 104.81 (13) | O2 <sup>i</sup> —Gd—O14B                 | 138.58 (10) |
| O3—Gd—O4                               | 52.57 (14)  | O4—Gd—O14B                               | 123.77 (12) |
| O2 <sup>i</sup> —Gd—O4                 | 77.10 (14)  | O14A <sup>i</sup> —Cu1—O14A              | 180.0       |
| O15A—Cu1—O1                            | 87.17 (12)  | O14A <sup>i</sup> —Cu1—O15A <sup>i</sup> | 93.30 (12)  |
| O14A <sup>i</sup> —Cu1—O1 <sup>i</sup> | 99.81 (12)  | O14A—Cu1—O15A <sup>i</sup>               | 86.70 (12)  |
| O14A—Cu1—O1 <sup>i</sup>               | 80.19 (12)  | O14A <sup>i</sup> —Cu1—O15A              | 86.70 (12)  |
| O15A <sup>i</sup> —Cu1—O1 <sup>i</sup> | 87.17 (12)  | O14A—Cu1—O15A                            | 93.30 (12)  |
| O15A—Cu1—O1 <sup>i</sup>               | 92.83 (12)  | O15A <sup>i</sup> —Cu1—O15A              | 180.0       |
| O1—Cu1—O1 <sup>i</sup>                 | 180.0       | O14A <sup>i</sup> —Cu1—O1                | 80.19 (12)  |
| O15A <sup>i</sup> —Cu1—O1              | 92.83 (12)  | O14A—Cu1—O1                              | 99.81 (12)  |
| O2A—Cu2—N1A                            | 94.38 (15)  | O2B—Cu3—N1N                              | 93.76 (16)  |
| O2A—Cu2—O14B                           | 95.50 (13)  | O2B—Cu3—O14B                             | 176.22 (13) |
| N1A—Cu2—O14B                           | 170.10 (15) | N1N—Cu3—O14B                             | 84.26 (15)  |
| O2A—Cu2—O15A                           | 177.19 (13) | O2B—Cu3—O1                               | 92.04 (13)  |
| N1A—Cu2—O15A                           | 84.76 (14)  | N1N—Cu3—O1                               | 168.93 (15) |
| O14B—Cu2—O15A                          | 85.34 (13)  | O14B—Cu3—O1                              | 90.44 (12)  |

|               |             |              |             |
|---------------|-------------|--------------|-------------|
| O2C—Cu4—O15B  | 99.09 (14)  | O2C—Cu4—O14C | 176.81 (15) |
| O14C—Cu4—O15B | 82.41 (13)  | O2C—Cu4—N1C  | 93.17 (16)  |
| N1C—Cu4—O15B  | 163.58 (16) | O14C—Cu4—N1C | 85.91 (15)  |

Symmetry codes: (i)  $-x+1, -y+1, -z+1$ ; (ii)  $-x, -y+1, -z+1$ ; (iii)  $-x, -y, -z+1$ .

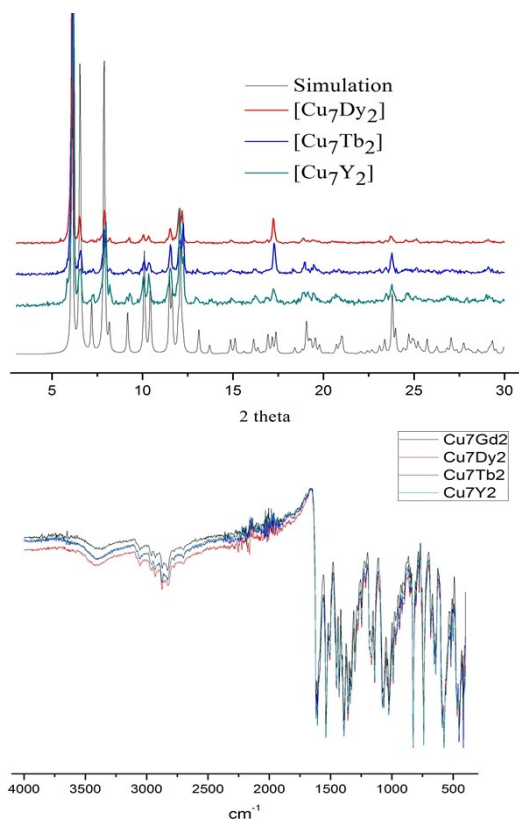

**Fig. S1** Powder XRD diagrams' comparison between **2**, **3** and **4**, with the simulated PXRD diagram of the Gd analogue, **1** (top); IR spectra comparison for **1-4** (bottom).

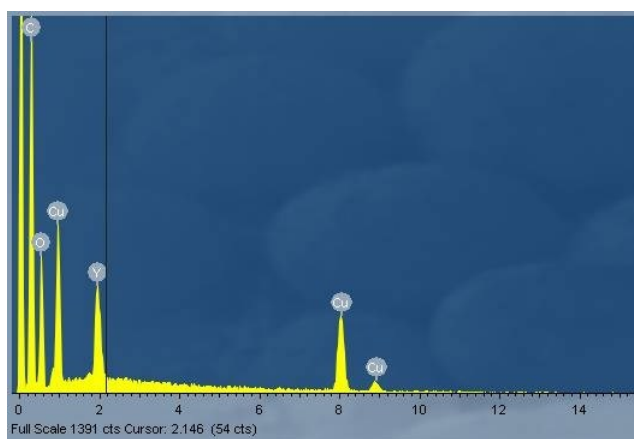

**Fig.S2** Representative Energy Dispersive X-ray Spectroscopy analysis for the  $[\text{Cu}^{\text{II}}_7\text{Y}^{\text{III}}_2]$  analogue, **4**.
